# Supplementary material for: Multiple glutathione disulfide removal pathways mediate cytosolic redox homeostasis
Source: Springer Nature journal article supplement (doi:10.1038/nchembio.1142), 2012-12-16
Supplement: 41589_2013_BFnchembio1142_MOESM456_ESM.pdf [file 41589_2013_BFnchembio1142_MOESM456_ESM.pdf]

# Supplementary Information

## Multiple glutathione disulfide removal pathways mediate cytosolic redox homeostasis

Bruce Morgan<sup>1</sup>, Daria Ezeriņa<sup>1</sup>, Theresa N.E. Amoako<sup>1</sup>, Jan Riemer<sup>2</sup>, Matthias Seedorf<sup>3</sup> and Tobias P. Dick<sup>1\*</sup>

<sup>1</sup>Division of Redox Regulation, DKFZ-ZMBH Alliance, German Cancer Research Center (DKFZ), Im Neuenheimer Feld 280, 69120 Heidelberg, Germany

<sup>2</sup>Cellular Biochemistry, University of Kaiserslautern, Erwin-Schrödinger-Str. 13, 67663 Kaiserslautern, Germany

<sup>3</sup>Zentrum für Molekulare Biologie der Universität Heidelberg (ZMBH), DKFZ-ZMBH Alliance, Im Neuenheimer Feld 282, 69120 Heidelberg, Germany

\*Corresponding Author

Tel.: +49-6221-42-2320

Fax: +49-6221-42-4406

Email: t.dick@dkfz.de

## Supplementary Results

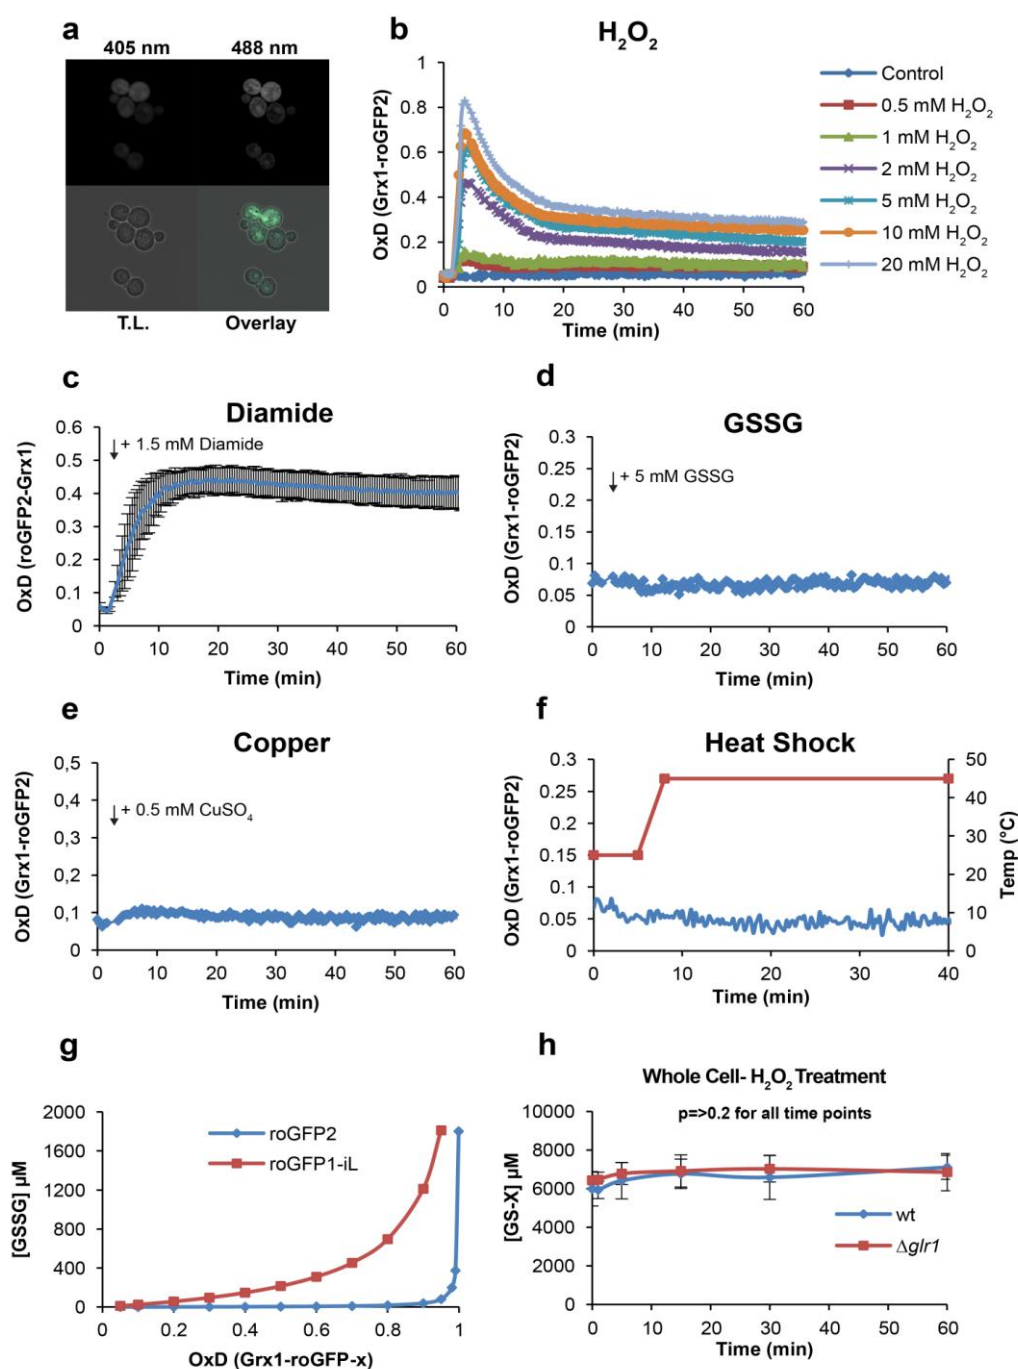

**Supplementary Figure 1. Related to main Figures 1 and 2. The cytosolic glutathione pool is robustly resistant to perturbation.**

(a) Fluorescence microscopy image, showing roGFP2-Grx1 probe emission at 405 nm and 488 nm in a wt cell, as well as transmitted light (T.L.) and an image overlay. (b–f) Cytosolic  $E_{GSH}$  response as measured with the Grx1-roGFP2 probe to the addition of (b) 0.5–20 mM  $H_2O_2$ , (c) 1.5 mM diamide, (d) 5 mM GSSG, (e) 0.5 mM copper sulphate, and (f) heat shock. (g) Relationship between the degree

of oxidation (OxD) of the roGFP2 and roGFP1-iL probes and the GSSG concentration assuming a 10 mM total glutathione pool. (h) Related to main Fig. 2e. Time course of the change in whole cell GS-X concentration measured in lysates prepared from wt and  $\Delta glr1$  cells. Samples were removed and immediately processed at the indicated time points following the addition of 1 mM H<sub>2</sub>O<sub>2</sub> (n=3).

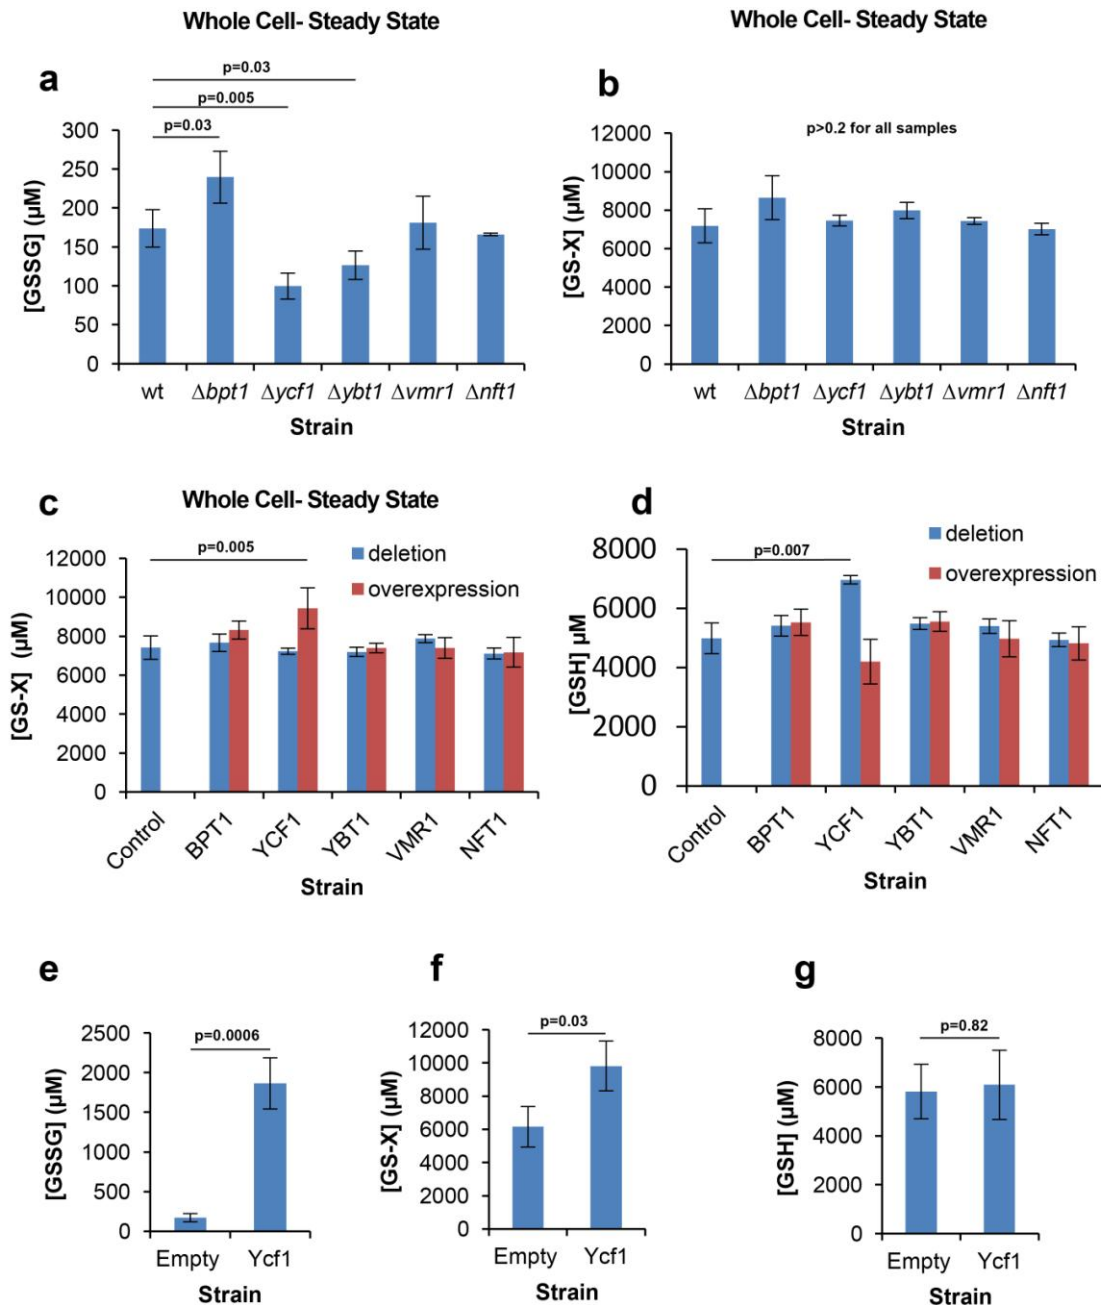

**Supplementary Figure 2. Related to main Figures 3 and 4. Ycf1 mediates vacuolar accumulation of cytosolic GSSG.**

(a–b) Whole cell GSSG (a) and total glutathione (GS-X) (b) levels in cells deleted for each of the vacuolar ABC-C transporters ( $n=3-5$ ). (c–d) Complementary to **Fig. 3a**. Whole cell steady state GS-X (c) and GSH levels (d) in  $\Delta glr1$  strains further deleted for or overexpressing each of the vacuolar ABC-C transporters ( $n=3-5$ ). (e–g) Whole cell GSSG (e), total glutathione (GS-X) (f), and GSH (g) levels in  $\Delta glr1\Delta ycf1$  cells expressing either an empty p416TEF vector (Empty) or p416TEF-YCF1 (Ycf1) ( $n=6$ ).

**a**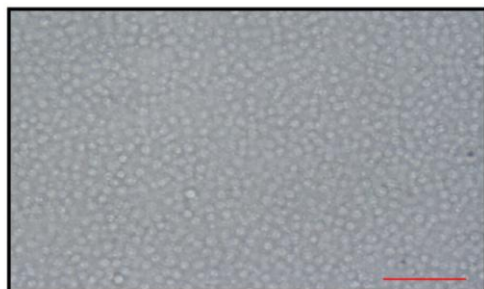**b**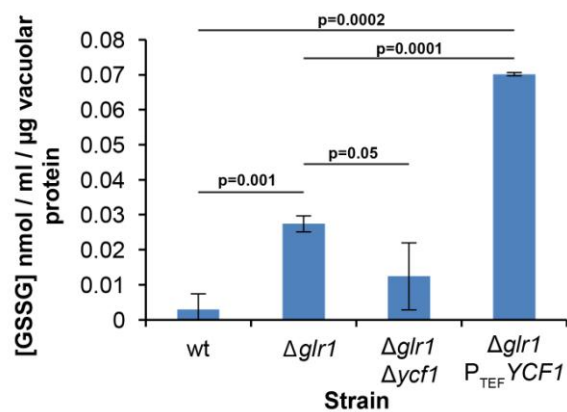

### Supplementary Figure 3. GSSG measurement in a highly enriched vacuolar fraction

(a) Microscopy image of enriched vacuolar fraction. Scale bar = 10  $\mu\text{m}$ , for comparison see also the microscopy image of ultra-pure yeast vacuoles in Wiederhold et al, 2009<sup>1</sup> (n=3). (b) GSSG concentration measured in enriched vacuolar fractions, isolated from wt,  $\Delta glr1$ ,  $\Delta glr1 \Delta ycf1$  and  $\Delta glr1 P_{TEF} YCF1$  strains.

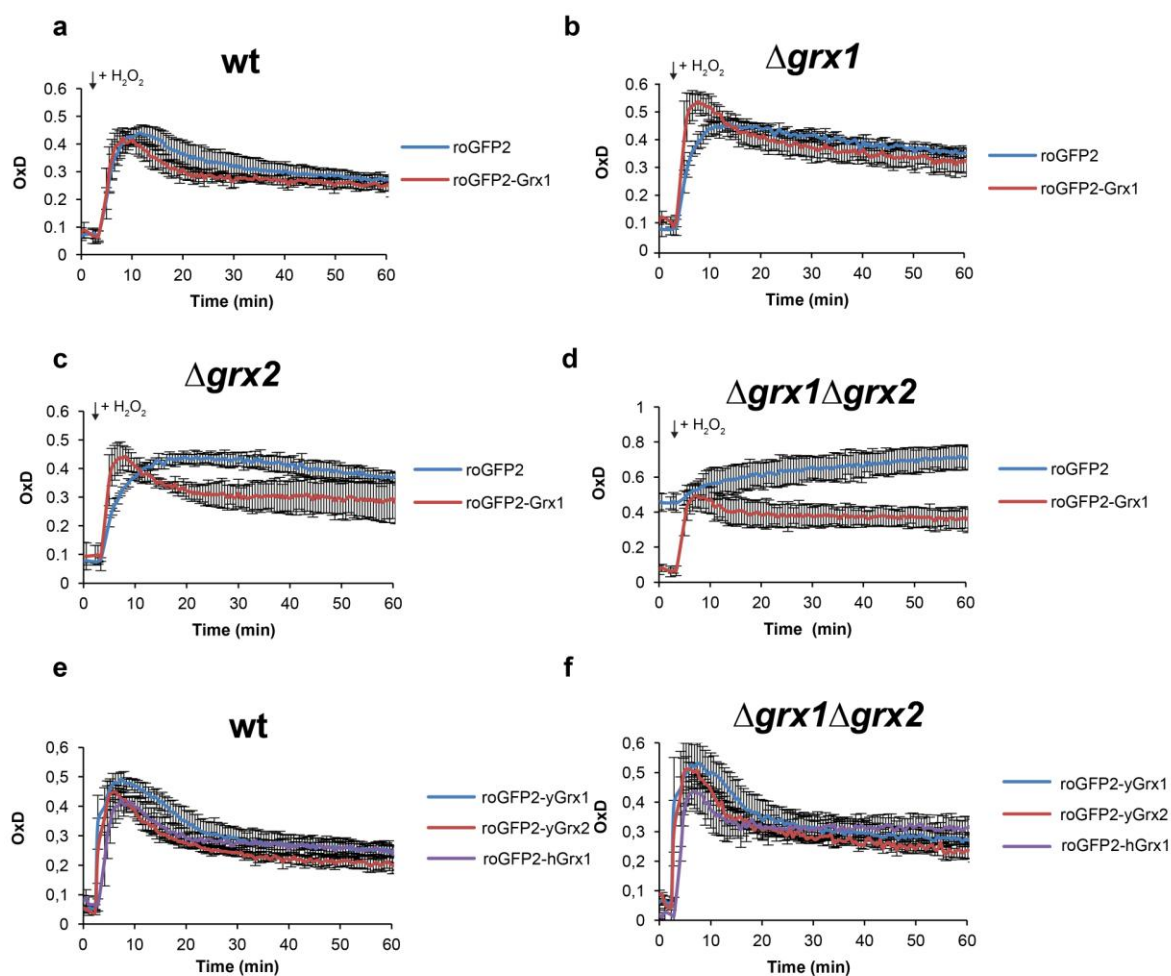

**Supplementary Figure 4. roGFP2 equilibration is strictly dependent upon the presence of a dithiol glutaredoxin.**

(a–d) roGFP2 strictly requires a dithiol Grx to equilibrate with the glutathione redox couple. Response of roGFP2 and roGFP2-Grx1 probes to the addition of 5 mM H<sub>2</sub>O<sub>2</sub> in (a) wt, (b)  $\Delta grx1$ , (c)  $\Delta grx2$ , or (d)  $\Delta grx1\Delta grx2$  cells (n=3). (e–f) roGFP2-yeastGrx fusion probes equilibrate with the cytosolic glutathione redox couple with equal efficiency to the roGFP2-humanGrx1 probe. Response of roGFP2-Grx1, roGFP2-yeastGrx1 and roGFP2-yeastGrx2 probes to the addition of 5 mM H<sub>2</sub>O<sub>2</sub> in (e) wt and (f)  $\Delta grx1\Delta grx2$  cells (n=3).

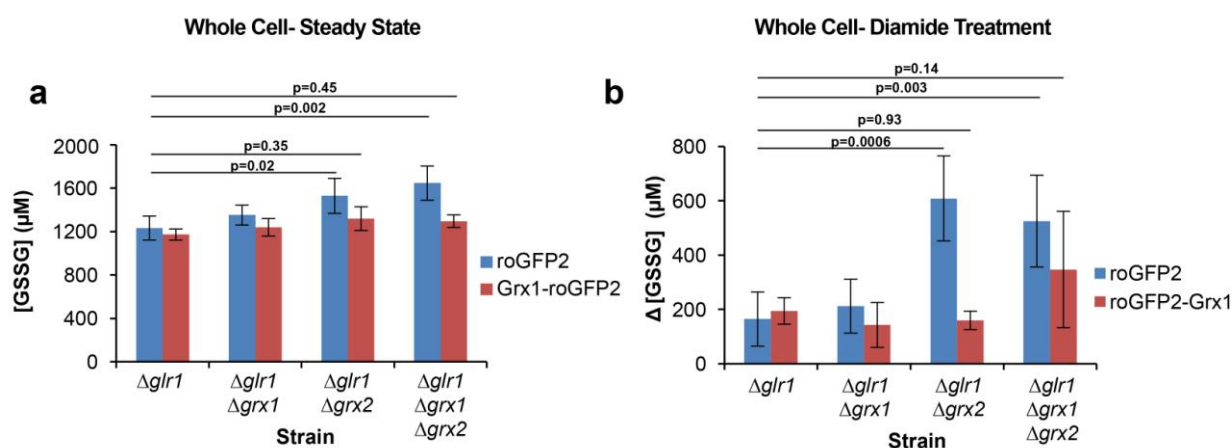

**Supplementary Figure 5. roGFP2-Grx1 expression does not significantly impact upon whole cell GSSG levels, but can compensate for the absence of endogenous Grxs.**

(a) GSSG levels at steady state in  $\Delta glr1$ ,  $\Delta glr1 \Delta grx1$ ,  $\Delta glr1 \Delta grx2$  and  $\Delta glr1 \Delta grx1 \Delta grx2$  cells transformed with either a roGFP2 or roGFP2-Grx1 probe (n=3). (b) Change in whole cell GSSG levels in the strains in (a) following 60 min treatment with 0.33 mM diamide (n=3).

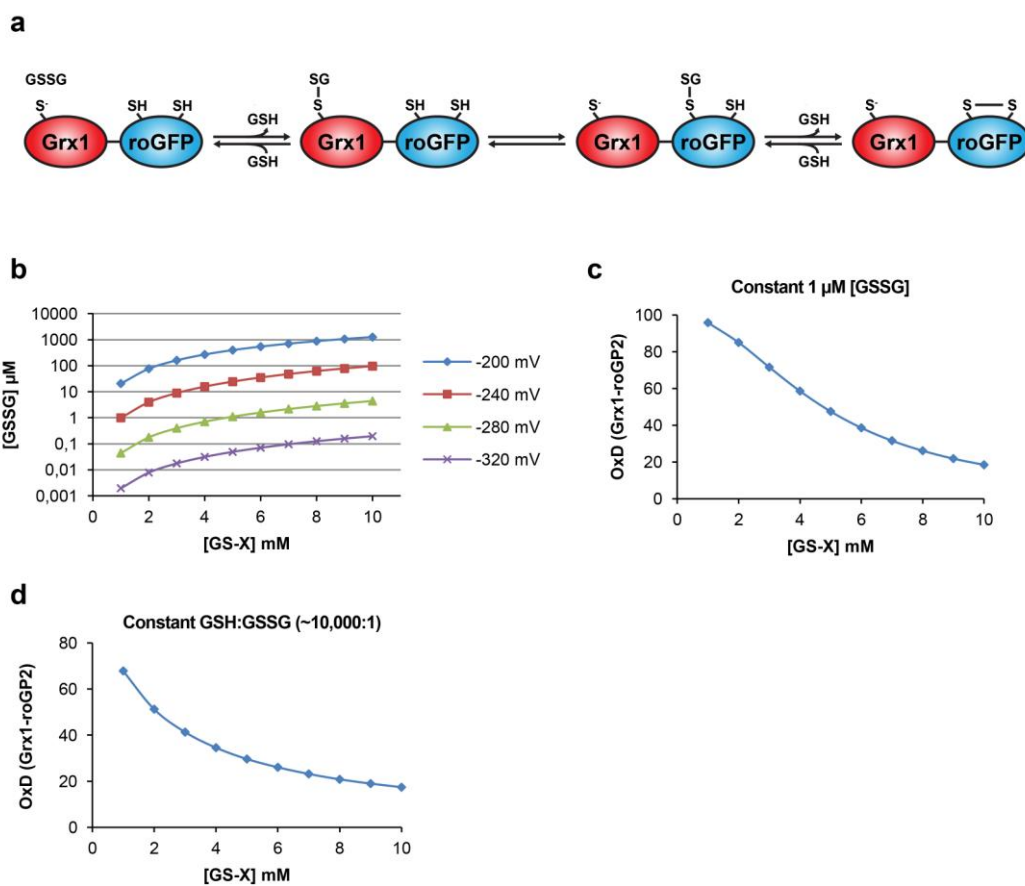

**Supplementary Figure 6. Considerations for the interpretation of roGFP-based probe data.**

(a) Cartoon illustrating the mechanism of the Grx1-roGFP2 probe. (b) Graph illustrating the relationship between [GS-X] and [GSSG] at various constant  $E_{\text{GSH}}$  values. (c) Graph illustrating the effect of changing [GS-X] on  $\text{OxD}_{\text{roGFP2}}$ , when [GSSG] is constant. (d) Plot of the effect of changing [GS-X] on  $\text{OxD}_{\text{roGFP2}}$  when GSH:GSSG is constant.



**Supplementary Table 1. Yeast strains used in this study.**

| <b>Strain</b> | <b>Genotype</b>                                                              | <b>Source</b> |
|---------------|------------------------------------------------------------------------------|---------------|
| <b>BY4741</b> | <i>MATa his3Δ1 leu2Δ0 met15Δ0 ura3Δ0</i>                                     | Euroscarf     |
| <b>BY4742</b> | <i>MATa his3Δ1 leu2Δ1 lys2Δ0 ura3Δ0</i>                                      | Euroscarf     |
| <b>YPH499</b> | <i>MATa ura3-52 lys2-801_amber ade2-101_ochre trp1-Δ63 his3-Δ200 leu2-Δ1</i> | Euroscarf     |
| <b>BM1</b>    | BY4741 <i>Δycf1::kanMX4</i>                                                  | Euroscarf     |
| <b>BM2</b>    | BY4742 <i>Δglr1::kanMX4</i>                                                  | Euroscarf     |
| <b>BM3</b>    | BY4742 <i>Δbpt1::kanMX4</i>                                                  | Euroscarf     |
| <b>BM4</b>    | BY4742 <i>Δycf1::kanMX4</i>                                                  | Euroscarf     |
| <b>BM5</b>    | BY4742 <i>Δybt1::kanMX4</i>                                                  | Euroscarf     |
| <b>BM6</b>    | BY4742 <i>Δvnr1::kanMX4</i>                                                  | Euroscarf     |
| <b>BM7</b>    | BY4742 <i>Δnft1::kanMX4</i>                                                  | Euroscarf     |
| <b>BM8</b>    | BY4742 <i>Δglr1::kanMX4 Δbpt1::natNT2</i>                                    | This Study    |
| <b>BM9</b>    | BY4742 <i>Δglr1::kanMX4 Δycf1::kanMX4</i>                                    | This Study    |
| <b>BM10</b>   | BY4742 <i>Δglr1::kanMX4 Δybt1::natNT2</i>                                    | This Study    |
| <b>BM11</b>   | BY4742 <i>Δglr1::kanMX4 Δvnr1::natNT2</i>                                    | This Study    |
| <b>BM12</b>   | BY4742 <i>Δglr1::kanMX4 Δnft1::natNT2</i>                                    | This Study    |
| <b>BM13</b>   | BY4742 <i>Δglr1::kanMX4 P<sub>TEF</sub>-BPT1::natNT2</i>                     | This Study    |
| <b>BM14</b>   | BY4742 <i>Δglr1::kanMX4 P<sub>TEF</sub>-YCF1::natNT2</i>                     | This Study    |
| <b>BM15</b>   | BY4742 <i>Δglr1::kanMX4 P<sub>TEF</sub>-YBT1::natNT2</i>                     | This Study    |
| <b>BM16</b>   | BY4742 <i>Δglr1::kanMX4 P<sub>TEF</sub>-VMR1::natNT2</i>                     | This Study    |
| <b>BM17</b>   | BY4742 <i>Δglr1::kanMX4 P<sub>TEF</sub>-NFT1::natNT2</i>                     | This Study    |
| <b>BM18</b>   | BY4742 <i>Δglr1::kanMX4 Δtrx1::hphNT1</i>                                    | This Study    |
| <b>BM19</b>   | BY4742 <i>Δglr1::kanMX4 Δtrx2::hphNT1</i>                                    | This Study    |
| <b>BM20</b>   | BY4742 <i>Δglr1::kanMX4 Δycf1::kanMX4 Δtrx1::hphNT1</i>                      | This Study    |
| <b>BM21</b>   | BY4742 <i>Δglr1::kanMX4 Δycf1::kanMX4 Δtrx2::hphNT1</i>                      | This Study    |
| <b>BM22</b>   | BY4742 <i>Δglr1::kanMX4 Δycf1::kanMX4 Δgrx2::natNT2</i>                      | This Study    |
| <b>BM23</b>   | BY4742 <i>Δglr1::kanMX4 Δycf1::kanMX4 Δtrx1::hphNT1 Δgrx2::natNT2</i>        | This Study    |
| <b>BM24</b>   | BY4742 <i>Δglr1::kanMX4 Δycf1::kanMX4 Δtrx2::hphNT1 Δgrx2::natNT2</i>        | This Study    |
| <b>BM25</b>   | YPH499 <i>Δgrx1::URA3</i>                                                    | This Study    |
| <b>BM26</b>   | YPH499 <i>Δgrx2::kanMX4</i>                                                  | This Study    |
| <b>BM27</b>   | YPH499 <i>Δgrx1::URA3 Δgrx2::kanMX4</i>                                      | This Study    |
| <b>BM28</b>   | YPH499 <i>Δglr1::natNT2</i>                                                  | This Study    |
| <b>BM29</b>   | YPH499 <i>Δglr1::natNT2 Δgrx1::URA3</i>                                      | This Study    |
| <b>BM30</b>   | YPH499 <i>Δglr1::natNT2 Δgrx2::kanMX4</i>                                    | This Study    |
| <b>BM31</b>   | YPH499 <i>Δglr1::natNT2 Δgrx1::URA3 Δgrx2::kanMX4</i>                        | This Study    |

**Supplementary Table 2. Plasmids used in this study.**

| <b>Plasmid</b> | <b>Description</b>                               | <b>Source</b> |
|----------------|--------------------------------------------------|---------------|
| <b>pBM1</b>    | p415 TEF Empty                                   | (2)           |
| <b>pBM2</b>    | p416 TEF Empty                                   | (2)           |
| <b>pBM5</b>    | p415 TEF Grx1-roGFP2                             | This Study    |
| <b>pBM3</b>    | p415 TEF roGFP2(yeast codon optimized)           | This Study    |
| <b>pBM4</b>    | p415 TEF roGFP2(yeast codon optimized)-Grx1      | This Study    |
| <b>pBM5</b>    | p415 TEF roGFP1-iL-Grx1                          | This Study    |
| <b>pBM6</b>    | p416 TEF <i>YCF1</i>                             | This Study    |
| <b>pBM7</b>    | p415 TEF roGFP2(yeast codon optimized)-yeastGrx1 | This Study    |
| <b>pBM8</b>    | p415 TEF roGFP2(yeast codon optimized)-yeastGrx2 | This Study    |

## Supplementary References

1. Wiederhold, E. et al. The yeast vacuolar membrane proteome. *Mol Cell Proteomics* **8**, 380-92 (2009).
2. Mumberg, D., Muller, R. & Funk, M. Yeast vectors for the controlled expression of heterologous proteins in different genetic backgrounds. *Gene* **156**, 119-22 (1995).
